# Supplementary material for: Integrating depth-dependent protist dynamics and microbial interactions in spring succession of a freshwater reservoir
Source: PubMed Central journal article supplement (PMC11080224; doi:10.1186/s40793-024-00574-5), 2024-05-08

**a**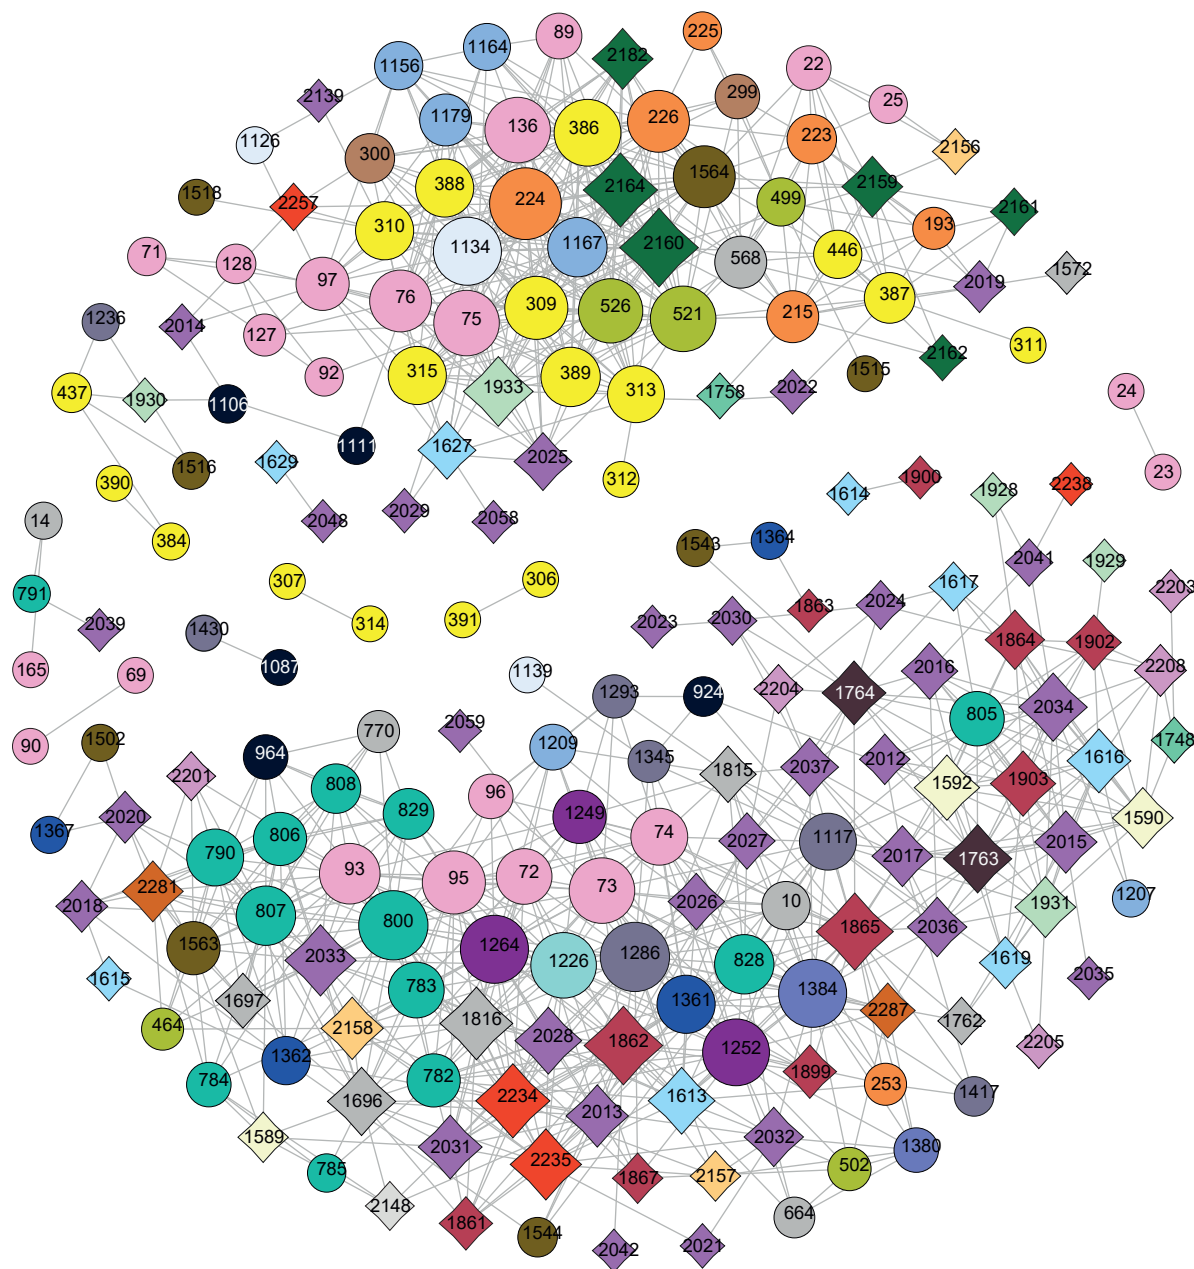

Prokaryotes

- Actinobacteriota
- Cytophagales
- Planctomycetota
- Comamonadaceae
- Gallionellaceae
- Methylomonadaceae
- Legionellaceae
- Verrucomicrobiota
- Chitinophagales
- Flavobacteriales
- Sphingobacteriales
- Other Alphaproteobacteria
- Burkholderiaceae
- Nitrosomonadaceae
- Other Gammaproteobacteria
- Others

Protists

- Bacillariophyceae
- Chrysophyceae
- Cryptophyceae
- Chlorophyceae
- Synurophyceae
- Ciliophora
- Telonemia
- Unclassified Alveolata
- Dinophyceae
- Cercozoa
- Bicoecia
- Katablepharida
- Excavata
- Others

**b**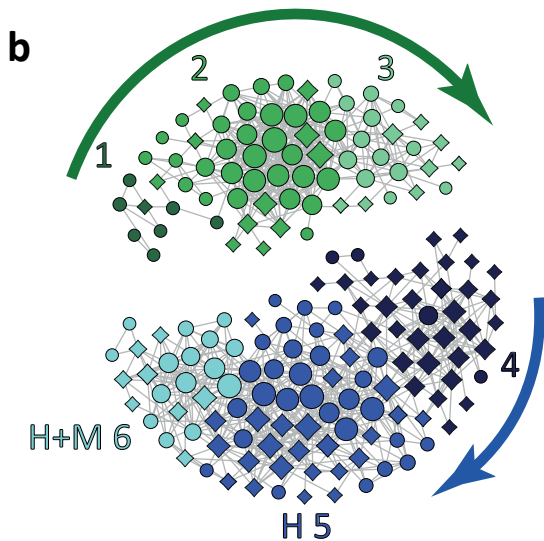**Additional file 11:**

Network analysis based on the most abundant ASVs from protistan and prokaryotic communities. **a** – network: upper cluster represents the community dominating in the epilimnion, lower cluster represents the community dominating in the hypolimnion. Prokaryotic nodes are displayed as circles, protistan nodes as diamonds. **b** – the main modules detected in the network. The arrows indicate directions of temporal shifts between modules. Differentiation between modules H 5 and H+M 6 is based on spatial parameters as members of module 6 were better resented in the metalimnion communities. Prokaryotic and protistan nodes are organized into modules and listed below, accompanied by heatmaps based on Z scores calculated for each module. Samples are grouped according to water column layers, with the time course depicted from left to right.

## Module 1

| Phylum            | Class               | Order            | Family            | Genus               | ID   | Epilimnion | Metalimnion | Hypolimnion |
|-------------------|---------------------|------------------|-------------------|---------------------|------|------------|-------------|-------------|
| Bacteroidota      | Bacteroidia         | Flavobacteriales | Flavobacteriaceae | Flavobacterium      | 384  |            |             |             |
| Bacteroidota      | Bacteroidia         | Flavobacteriales | Flavobacteriaceae | Flavobacterium      | 390  |            |             |             |
| Bacteroidota      | Bacteroidia         | Flavobacteriales | Flavobacteriaceae | Flavobacterium      | 437  |            |             |             |
| Verrucomicrobiota | Verrucomicrobiae    | NA               | NA                | NA                  | 1516 |            |             |             |
| Proteobacteria    | Gammaproteobacteria | Burkholderiales  | Methylophilaceae  | Methylotenera       | 1236 |            |             |             |
| Proteobacteria    | Alphaproteobacteria | Sphingomonadales | Sphingomonadaceae | Sphingorhabdus      | 1106 |            |             |             |
| Proteobacteria    | Alphaproteobacteria | Sphingomonadales | Sphingomonadaceae | Sphingorhabdus      | 1111 |            |             |             |
| Archaeplastida    | Chlorophyta         | Chlorophyceae    | Chlamydomonadales | Chlamydomonadales_X | 1930 |            |             |             |

## Module 2

| Phylum            | Class               | Order              | Family              | Genus                   | ID   | Epilimnion | Metalimnion | Hypolimnion |
|-------------------|---------------------|--------------------|---------------------|-------------------------|------|------------|-------------|-------------|
| Actinobacteriota  | Actinobacteria      | Frankiales         | Sporichthyaceae     | Candidatus Planktophila | 71   |            |             |             |
| Actinobacteriota  | Actinobacteria      | Frankiales         | Sporichthyaceae     | Candidatus Planktophila | 75   |            |             |             |
| Actinobacteriota  | Actinobacteria      | Frankiales         | Sporichthyaceae     | Candidatus Planktophila | 76   |            |             |             |
| Actinobacteriota  | Actinobacteria      | Frankiales         | Sporichthyaceae     | hgcl clade              | 89   |            |             |             |
| Actinobacteriota  | Actinobacteria      | Frankiales         | Sporichthyaceae     | hgcl clade              | 92   |            |             |             |
| Actinobacteriota  | Actinobacteria      | Frankiales         | Sporichthyaceae     | hgcl clade              | 97   |            |             |             |
| Actinobacteriota  | Actinobacteria      | Frankiales         | Sporichthyaceae     | NA                      | 127  |            |             |             |
| Actinobacteriota  | Actinobacteria      | Frankiales         | Sporichthyaceae     | NA                      | 128  |            |             |             |
| Actinobacteriota  | Actinobacteria      | Micrococcales      | Microbacteriaceae   | Candidatus Limnoluna    | 136  |            |             |             |
| Bacteroidota      | Bacteroidia         | Chitinophagales    | Chitinophagaceae    | Sediminibacterium       | 224  |            |             |             |
| Bacteroidota      | Bacteroidia         | Chitinophagales    | Chitinophagaceae    | Sediminibacterium       | 225  |            |             |             |
| Bacteroidota      | Bacteroidia         | Chitinophagales    | Chitinophagaceae    | Sediminibacterium       | 226  |            |             |             |
| Bacteroidota      | Bacteroidia         | Cytophagales       | Spirosomaceae       | Pseudarcicella          | 299  |            |             |             |
| Bacteroidota      | Bacteroidia         | Cytophagales       | Spirosomaceae       | Pseudarcicella          | 300  |            |             |             |
| Bacteroidota      | Bacteroidia         | Flavobacteriales   | Crocinitomicaceae   | Fluviicola              | 309  |            |             |             |
| Bacteroidota      | Bacteroidia         | Flavobacteriales   | Crocinitomicaceae   | Fluviicola              | 310  |            |             |             |
| Bacteroidota      | Bacteroidia         | Flavobacteriales   | Crocinitomicaceae   | Fluviicola              | 312  |            |             |             |
| Bacteroidota      | Bacteroidia         | Flavobacteriales   | Crocinitomicaceae   | Fluviicola              | 313  |            |             |             |
| Bacteroidota      | Bacteroidia         | Flavobacteriales   | Crocinitomicaceae   | Fluviicola              | 315  |            |             |             |
| Bacteroidota      | Bacteroidia         | Flavobacteriales   | Flavobacteriaceae   | Flavobacterium          | 386  |            |             |             |
| Bacteroidota      | Bacteroidia         | Flavobacteriales   | Flavobacteriaceae   | Flavobacterium          | 387  |            |             |             |
| Bacteroidota      | Bacteroidia         | Flavobacteriales   | Flavobacteriaceae   | Flavobacterium          | 388  |            |             |             |
| Bacteroidota      | Bacteroidia         | Flavobacteriales   | Flavobacteriaceae   | Flavobacterium          | 389  |            |             |             |
| Bacteroidota      | Bacteroidia         | Sphingobacteriales | Sphingobacteriaceae | Pedobacter              | 521  |            |             |             |
| Bacteroidota      | Bacteroidia         | Sphingobacteriales | Sphingobacteriaceae | Solitalea               | 526  |            |             |             |
| Proteobacteria    | Gammaproteobacteria | Burkholderiales    | Burkholderiaceae    | Polynucleobacter        | 1126 |            |             |             |
| Proteobacteria    | Gammaproteobacteria | Burkholderiales    | Burkholderiaceae    | Polynucleobacter        | 1134 |            |             |             |
| Proteobacteria    | Gammaproteobacteria | Burkholderiales    | Comamonadaceae      | Acidovorax              | 1156 |            |             |             |
| Proteobacteria    | Gammaproteobacteria | Burkholderiales    | Comamonadaceae      | Limnohabitans           | 1164 |            |             |             |
| Proteobacteria    | Gammaproteobacteria | Burkholderiales    | Comamonadaceae      | Limnohabitans           | 1167 |            |             |             |
| Proteobacteria    | Gammaproteobacteria | Burkholderiales    | Comamonadaceae      | NA                      | 1179 |            |             |             |
| Verrucomicrobiota | Verrucomicrobiae    | NA                 | NA                  | NA                      | 1518 |            |             |             |
| Verrucomicrobiota | Verrucomicrobiae    | Verrucomicrobiales | Verrucomicrobiaceae | NA                      | 1564 |            |             |             |
| Alveolata         | Ciliophora          | Spirotrichea       | Strombidiida        | Pelagostrombidiidae     | 2014 |            |             |             |
| Hacrobia          | Haptophyta          | Prymnesiophyceae   | Prymnesiales        | Chrysochromulinaceae    | 2257 |            |             |             |
| Alveolata         | Ciliophora          | NA                 | NA                  | NA                      | 2139 |            |             |             |
| Stramenopiles     | Ochrophyta          | Chrysophyceae      | Chrysophyceae_X     | NA                      | 1627 |            |             |             |
| Alveolata         | Ciliophora          | Oligohymenophora   | Peritrichia_2       | Sessilida               | 2058 |            |             |             |
| Alveolata         | Ciliophora          | Spirotrichea       | Tintinnida          | TIN_03                  | 2029 |            |             |             |
| Alveolata         | Ciliophora          | Spirotrichea       | Hypotrichia         | Oxytrichidae            | 2025 |            |             |             |
| Hacrobia          | Cryptophyta         | Cryptophyceae      | Cryptomonadales     | Cryptomonadales_X       | 2164 |            |             |             |
| Hacrobia          | Cryptophyta         | NA                 | NA                  | NA                      | 2182 |            |             |             |
| Archaeplastida    | Chlorophyta         | Chlorophyceae      | Chlamydomonadales   | Chlamydomonadales_X     | 1933 |            |             |             |
| Hacrobia          | Cryptophyta         | Cryptophyceae      | Cryptomonadales     | Cryptomonadales_X       | 2160 |            |             |             |

Z score

Max

50%

0

Prokaryotic  
ASVs

Protistan  
ASVs

### Module 3

| Phylum            | Class               | Order              | Family               | Genus                 | ID   | Epilimnion | Metalimnion | Hypolimnion |
|-------------------|---------------------|--------------------|----------------------|-----------------------|------|------------|-------------|-------------|
| Chloroflexi       | SL56 marine group   | NA                 | NA                   | NA                    | 568  |            |             |             |
| Bacteroidota      | Bacteroidia         | Chitinophagales    | Chitinophagaceae     | NA                    | 215  |            |             |             |
| Verrucomicrobiota | Verrucomicrobiae    | NA                 | NA                   | NA                    | 1515 |            |             |             |
| Bacteroidota      | Bacteroidia         | Flavobacteriales   | Crocinitomicaceae    | Fluviicola            | 311  |            |             |             |
| Bacteroidota      | Bacteroidia         | Flavobacteriales   | NS9 marine group     | NA                    | 446  |            |             |             |
| Bacteroidota      | Bacteroidia         | Chitinophagales    | Chitinophagaceae     | Edaphobaculum         | 193  |            |             |             |
| Bacteroidota      | Bacteroidia         | Sphingobacteriales | NS11-12 marine group | NA                    | 499  |            |             |             |
| Bacteroidota      | Bacteroidia         | Chitinophagales    | Chitinophagaceae     | Sediminibacterium     | 223  |            |             |             |
| Actinobacteriota  | Acidimicrobiia      | Microtrichales     | Ilumatobacteraceae   | CL500-29 marine group | 22   |            |             |             |
| Actinobacteriota  | Acidimicrobiia      | Microtrichales     | Ilumatobacteraceae   | CL500-29 marine group | 25   |            |             |             |
| Alveolata         | Apicomplexa         | Cocciidiomorpha    | Adeleida             | NA                    | 1572 |            |             |             |
| Alveolata         | Ciliophora          | Spirotrichea       | Strombidiida_A       | Strombidiida_A_X      | 2022 |            |             |             |
| Hacrobia          | Katablepharidophyta | Katablepharidaceae | Katablepharidales    | Katablepharidales_X   | 2156 |            |             |             |
| Hacrobia          | Cryptophyta         | Cryptophyceae      | Cryptomonadales      | Cryptomonadales_X     | 2159 |            |             |             |
| Hacrobia          | Cryptophyta         | Cryptophyceae      | Cryptomonadales      | Cryptomonadales_X     | 2161 |            |             |             |
| Hacrobia          | Cryptophyta         | Cryptophyceae      | Cryptomonadales      | Cryptomonadales_X     | 2162 |            |             |             |
| Stramenopiles     | Ochrophyta          | Synurophyceae      | Synurales            | Synurales_X           | 1758 |            |             |             |
| Alveolata         | Ciliophora          | Spirotrichea       | Choreotrichida       | Strobiliidiidae_D     | 2019 |            |             |             |

Z score

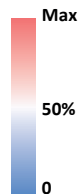

Prokaryotic ASVs

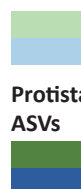

### Module 4

| Phylum            | Class               | Order               | Family            | Genus                      | ID   | Epilimnion | Metalimnion | Hypolimnion |
|-------------------|---------------------|---------------------|-------------------|----------------------------|------|------------|-------------|-------------|
| Planctomycetota   | Planctomycetes      | Pirellulales        | Pirellulaceae     | NA                         | 805  |            |             |             |
| Verrucomicrobiota | Verrucomicrobiae    | Pedosphaerales      | Pedosphaeraceae   | NA                         | 1543 |            |             |             |
| Proteobacteria    | Gammaproteobacteria | Legionellales       | Legionellaceae    | Legionella                 | 1364 |            |             |             |
| Proteobacteria    | Gammaproteobacteria | Burkholderiales     | Comamonadaceae    | Polaromonas                | 1207 |            |             |             |
| Stramenopiles     | Ochrophyta          | Bacillariophyta     | Bacillariophyta_X | Polar-centric-Mediophyceae | 1590 |            |             |             |
| Stramenopiles     | Ochrophyta          | Bacillariophyta     | Bacillariophyta_X | Polar-centric-Mediophyceae | 1592 |            |             |             |
| Stramenopiles     | Ochrophyta          | Chrysophyceae       | Chrysophyceae_X   | Chrysophyceae_Clade-C      | 1616 |            |             |             |
| Stramenopiles     | Ochrophyta          | Chrysophyceae       | Chrysophyceae_X   | NA                         | 1617 |            |             |             |
| Stramenopiles     | Ochrophyta          | Chrysophyceae       | Chrysophyceae_X   | Chrysophyceae_Clade-E      | 1619 |            |             |             |
| Stramenopiles     | Ochrophyta          | Synurophyceae       | Synurales         | Synurales_X                | 1748 |            |             |             |
| Stramenopiles     | Opalozoa            | Bicoecea            | Bicoceales        | Bicoecaceae                | 1763 |            |             |             |
| Stramenopiles     | Opalozoa            | Bicoecea            | Bicoceales        | Bicoecaceae                | 1764 |            |             |             |
| Rhizaria          | Cercozoa            | NA                  | NA                | NA                         | 1863 |            |             |             |
| Rhizaria          | Cercozoa            | Filosa-Thecofilosea | Ebriida           | Botuliformidae             | 1864 |            |             |             |
| Rhizaria          | Cercozoa            | NA                  | NA                | NA                         | 1902 |            |             |             |
| Rhizaria          | Cercozoa            | NA                  | NA                | NA                         | 1903 |            |             |             |
| Archaeplastida    | Chlorophyta         | Chlorophyceae       | Chlamydomonadales | Chlamydomonadales_X        | 1928 |            |             |             |
| Archaeplastida    | Chlorophyta         | Chlorophyceae       | Chlamydomonadales | Chlamydomonadales_X        | 1929 |            |             |             |
| Archaeplastida    | Chlorophyta         | Chlorophyceae       | Chlamydomonadales | Chlamydomonadales_X        | 1931 |            |             |             |
| Alveolata         | Ciliophora          | Oligohymenophore:   | Scuticociliatia_2 | Histiobalantiidae          | 2012 |            |             |             |
| Alveolata         | Ciliophora          | Spirotrichea        | Tintinnida        | Tintinnidiidae             | 2015 |            |             |             |
| Alveolata         | Ciliophora          | Oligohymenophore:   | Peritrichia_2     | Sessilida                  | 2016 |            |             |             |
| Alveolata         | Ciliophora          | Spirotrichea        | Hypotrichia       | NA                         | 2017 |            |             |             |
| Alveolata         | Ciliophora          | Litostomatea        | Litostomatea_X    | Litostomatea_XX            | 2023 |            |             |             |
| Alveolata         | Ciliophora          | Colpodea            | Colpodea_X        | NA                         | 2024 |            |             |             |
| Alveolata         | Ciliophora          | NA                  | NA                | NA                         | 2030 |            |             |             |
| Alveolata         | Ciliophora          | Oligohymenophore:   | Peritrichia_2     | Sessilida                  | 2034 |            |             |             |
| Alveolata         | Ciliophora          | Spirotrichea        | Tintinnida        | Tintinnidiidae             | 2035 |            |             |             |
| Alveolata         | Ciliophora          | Litostomatea        | NA                | NA                         | 2036 |            |             |             |
| Alveolata         | Ciliophora          | Phyllopharyngea     | Suctorina         | Tokophryidae               | 2037 |            |             |             |
| Alveolata         | Ciliophora          | Oligohymenophore:   | Peritrichia_2     | Sessilida                  | 2041 |            |             |             |
| Alveolata         | Dinoflagellata      | Dinophyceae         | Gymnodiniales     | Gymnodiniaceae             | 2203 |            |             |             |
| Alveolata         | Dinoflagellata      | Dinophyceae         | Prorocentrales    | Prorocentraceae            | 2204 |            |             |             |
| Alveolata         | Dinoflagellata      | Dinophyceae         | Prorocentrales    | Prorocentraceae            | 2205 |            |             |             |
| Alveolata         | Dinoflagellata      | Dinophyceae         | NA                | NA                         | 2208 |            |             |             |
| Alveolata         | NA                  | NA                  | NA                | NA                         | 2238 |            |             |             |

## Module 5

| Phylum            | Class               | Order               | Family               | Genus                   | ID   | Epilimnion | Metalimnion | Hypolimnion |
|-------------------|---------------------|---------------------|----------------------|-------------------------|------|------------|-------------|-------------|
| Acidobacteriota   | Vicinamibacteria    | Vicinamibacteriales | NA                   | NA                      | 10   |            |             |             |
| Actinobacteriota  | Actinobacteria      | Frankiales          | Sporichthyaceae      | Candidatus Planktophila | 72   |            |             |             |
| Actinobacteriota  | Actinobacteria      | Frankiales          | Sporichthyaceae      | Candidatus Planktophila | 73   |            |             |             |
| Actinobacteriota  | Actinobacteria      | Frankiales          | Sporichthyaceae      | Candidatus Planktophila | 74   |            |             |             |
| Actinobacteriota  | Actinobacteria      | Frankiales          | Sporichthyaceae      | hgcl clade              | 95   |            |             |             |
| Actinobacteriota  | Actinobacteria      | Frankiales          | Sporichthyaceae      | hgcl clade              | 96   |            |             |             |
| Bacteroidota      | Bacteroidia         | Chitinophagales     | NA                   | NA                      | 253  |            |             |             |
| Bacteroidota      | Bacteroidia         | Sphingobacteriales  | NS11-12 marine group | NA                      | 502  |            |             |             |
| Myxococcota       | Polyangia           | mle1-27             | NA                   | NA                      | 664  |            |             |             |
| Planctomycetota   | Phycisphaerae       | Phycisphaerales     | Phycisphaeraceae     | CL500-3                 | 782  |            |             |             |
| Planctomycetota   | Phycisphaerae       | Phycisphaerales     | Phycisphaeraceae     | CL500-3                 | 783  |            |             |             |
| Planctomycetota   | Phycisphaerae       | Phycisphaerales     | Phycisphaeraceae     | CL500-3                 | 785  |            |             |             |
| Planctomycetota   | Planctomycetes      | Pirellulales        | Pirellulaceae        | NA                      | 808  |            |             |             |
| Planctomycetota   | Planctomycetes      | Planctomycetales    | Rubinisphaeraceae    | SH-PL14                 | 828  |            |             |             |
| Proteobacteria    | Alphaproteobacteria | Rhizobiales         | Beijerinckiaceae     | alpha cluster           | 924  |            |             |             |
| Proteobacteria    | Gammaproteobacteria | Burkholderiales     | Alcaligenaceae       | GKS98 freshwater group  | 1117 |            |             |             |
| Proteobacteria    | Gammaproteobacteria | Burkholderiales     | Burkholderiaceae     | Polynucleobacter        | 1139 |            |             |             |
| Proteobacteria    | Gammaproteobacteria | Burkholderiales     | Comamonadaceae       | Rhizobacter             | 1209 |            |             |             |
| Proteobacteria    | Gammaproteobacteria | Burkholderiales     | Gallionellaceae      | Candidatus Nitrotoga    | 1226 |            |             |             |
| Proteobacteria    | Gammaproteobacteria | Burkholderiales     | Nitrosomonadaceae    | GOUTA6                  | 1249 |            |             |             |
| Proteobacteria    | Gammaproteobacteria | Burkholderiales     | Nitrosomonadaceae    | NA                      | 1252 |            |             |             |
| Proteobacteria    | Gammaproteobacteria | Burkholderiales     | Nitrosomonadaceae    | Nitrosospira            | 1264 |            |             |             |
| Proteobacteria    | Gammaproteobacteria | Burkholderiales     | SC-I-84              | NA                      | 1286 |            |             |             |
| Proteobacteria    | Gammaproteobacteria | Burkholderiales     | TRA3-20              | NA                      | 1293 |            |             |             |
| Proteobacteria    | Gammaproteobacteria | Diplorickettsiales  | Diplorickettsiaceae  | Rickettsiella           | 1345 |            |             |             |
| Proteobacteria    | Gammaproteobacteria | Legionellales       | Legionellaceae       | Legionella              | 1361 |            |             |             |
| Proteobacteria    | Gammaproteobacteria | Methylococcales     | Methylomonadaceae    | Methylobacter           | 1380 |            |             |             |
| Proteobacteria    | Gammaproteobacteria | Methylococcales     | Methylomonadaceae    | Methylobacter           | 1384 |            |             |             |
| Proteobacteria    | Gammaproteobacteria | Pseudomonadales     | Pseudohongiellaceae  | Blyi10                  | 1417 |            |             |             |
| Verrucomicrobiota | Verrucomicrobiae    | Pedosphaerales      | Pedosphaeraceae      | NA                      | 1544 |            |             |             |
| Verrucomicrobiota | Verrucomicrobiae    | Verrucomicrobiales  | Verrucomicrobiaceae  | NA                      | 1563 |            |             |             |
| Stramenopiles     | Ochrophyta          | Chrysophyceae       | Chrysophyceae_X      | NA                      | 1613 |            |             |             |
| Stramenopiles     | Ochrophyta          | NA                  | NA                   | NA                      | 1696 |            |             |             |
| Stramenopiles     | Pseudofungi         | MAST-2              | MAST-2C              | MAST-2C_X               | 1762 |            |             |             |
| Stramenopiles     | NA                  | NA                  | NA                   | NA                      | 1815 |            |             |             |
| Stramenopiles     | NA                  | NA                  | NA                   | NA                      | 1816 |            |             |             |
| Rhizaria          | Cercozoa            | Filosa-Imbricatea   | Filosa-Imbricatea_X  | Novel-clade-2           | 1861 |            |             |             |
| Rhizaria          | Cercozoa            | Filosa-Imbricatea   | Thaumatomonadida     | Peregriniidae           | 1862 |            |             |             |
| Rhizaria          | Cercozoa            | Filosa-Thecofilosea | Cryomonadida         | Cryothecomonas-lineage  | 1865 |            |             |             |
| Rhizaria          | Cercozoa            | Filosa-Thecofilosea | Cryomonadida         | NA                      | 1867 |            |             |             |
| Rhizaria          | Cercozoa            | NA                  | NA                   | NA                      | 1899 |            |             |             |
| Alveolata         | Ciliophora          | NA                  | NA                   | NA                      | 2013 |            |             |             |
| Alveolata         | Ciliophora          | Oligohymenophorea   | Hymenostomatia       | Ophryoglenida           | 2021 |            |             |             |
| Alveolata         | Ciliophora          | Spirotrichea        | Choreotrichida       | NA                      | 2026 |            |             |             |
| Alveolata         | Ciliophora          | NA                  | NA                   | NA                      | 2027 |            |             |             |
| Alveolata         | Ciliophora          | NA                  | NA                   | NA                      | 2028 |            |             |             |
| Alveolata         | Ciliophora          | NA                  | NA                   | NA                      | 2031 |            |             |             |
| Alveolata         | Ciliophora          | NA                  | NA                   | NA                      | 2032 |            |             |             |
| Alveolata         | Ciliophora          | Litostomatea        | NA                   | NA                      | 2042 |            |             |             |
| Alveolata         | Ciliophora          | Ciliophora_X        | Ciliophora_XX        | Ciliophora_XXX          | 2059 |            |             |             |
| Hacrobia          | Telonemia           | Telonemia_X         | Telonemia_XX         | Telonemia-Group-2       | 2148 |            |             |             |
| Hacrobia          | Katablepharidophyta | Katablepharidaceae  | Katablepharidales    | Katablepharidales_X     | 2157 |            |             |             |
| Hacrobia          | Katablepharidophyta | Katablepharidaceae  | Katablepharidales    | Katablepharidales_X     | 2158 |            |             |             |
| Alveolata         | NA                  | NA                  | NA                   | NA                      | 2234 |            |             |             |
| Alveolata         | NA                  | NA                  | NA                   | NA                      | 2235 |            |             |             |
| Excavata          | Discoba             | Kinetoplastea       | Eubodonida           | Bodonidae               | 2287 |            |             |             |

Z score

Max

50%

0

Prokaryotic  
ASVs

Protistan  
ASVs

## Module 6

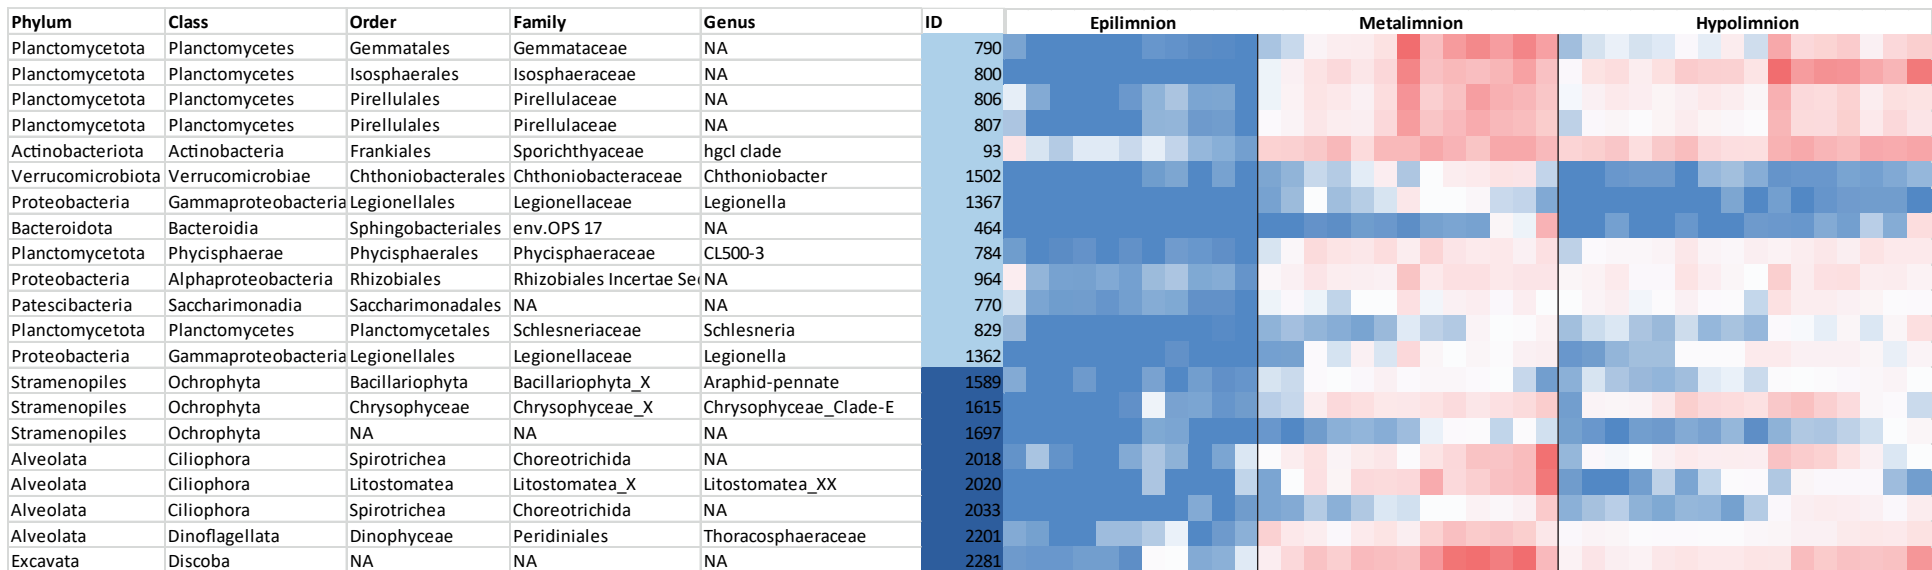

## Diverse small modules

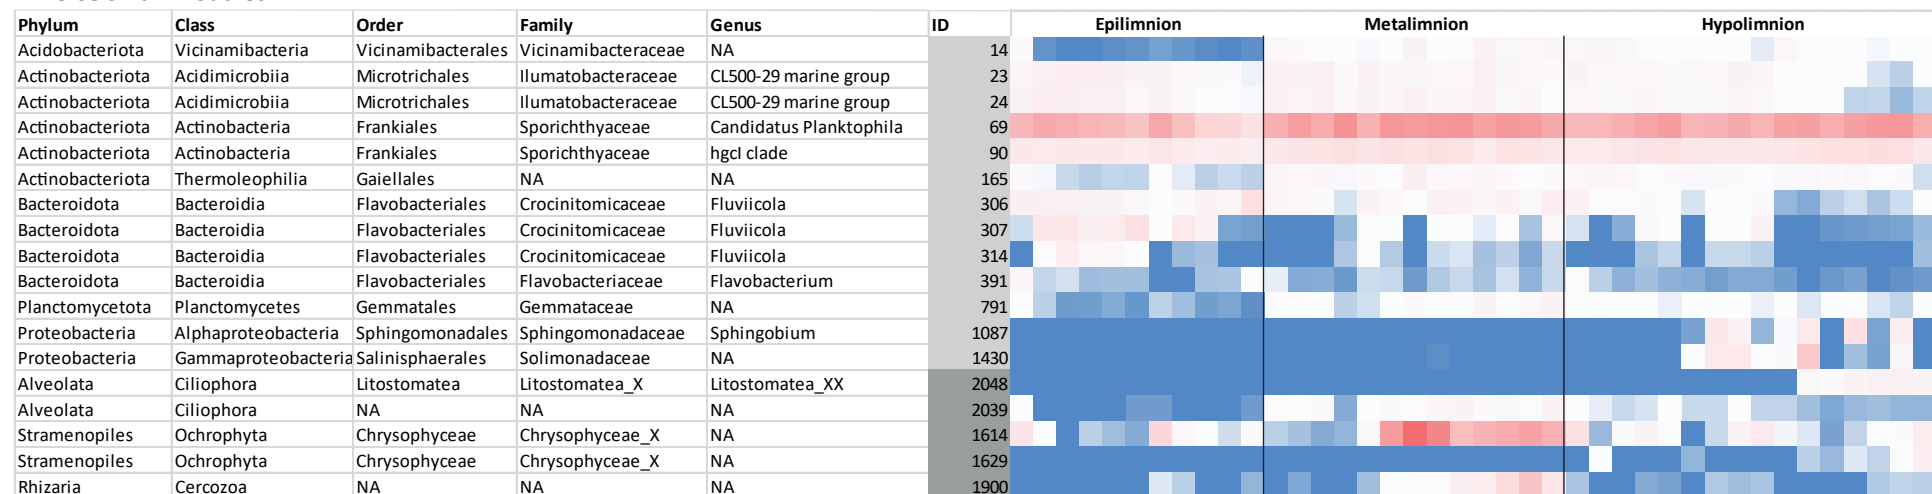

Supplement: 40793_2024_574_MOESM11_ESM.pdf [file 40793_2024_574_MOESM11_ESM.pdf]
