# Supplementary material for: Integrating depth-dependent protist dynamics and microbial interactions in spring succession of a freshwater reservoir
Source: PubMed Central journal article supplement (PMC11080224; doi:10.1186/s40793-024-00574-5), 2024-05-08
Supplement: 40793_2024_574_MOESM2_ESM.pdf [file 40793_2024_574_MOESM2_ESM.pdf]

**Additional file 2:** Chemistry data. DOC - dissolved organic carbon, DN - dissolved nitrogen, DSi - dissolved silica, TP - total phosphorus, DP - dissolved phosphorus, DRP dissolved reactive phosphorus, A254-400 absorbance measured at corresponding wavelength (nm).

**Epilimnion 0.5m**

| Date      | pH   | DOC<br>mg/L | DN<br>mg/L | DSi<br>mg/L | TP<br>mg/L | DP<br>µg/l | DRP<br>µg/l | NH <sub>4</sub> -N<br>µg/l | NO <sub>3</sub> -N<br>mg/L | A254  | A300  | A350  | A400  |
|-----------|------|-------------|------------|-------------|------------|------------|-------------|----------------------------|----------------------------|-------|-------|-------|-------|
| 31-Mar-16 | 7.07 | 4.69        | 1.35       | 6.7         | 33.0       | 20.4       | 4.8         | 8.3                        | 1.21                       | 0.160 | 0.087 | 0.038 | 0.016 |
| 07-Apr-16 | 7.44 | 4.79        | 1.41       | 5.7         | 25.6       | 10.3       | 2.1         | 4.3                        | 1.08                       | 0.156 | 0.085 | 0.037 | 0.015 |
| 11-Apr-16 | 7.32 | 4.94        | -          | 5.7         | 20.1       | 11.2       | 2.9         | 31.8                       | 1.11                       | 0.155 | 0.083 | 0.036 | 0.015 |
| 13-Apr-16 | 7.38 | 4.64        | 1.51       | 5.6         | 22.8       | 10.5       | 3.0         | 28.0                       | 1.07                       | 0.145 | 0.073 | 0.030 | 0.009 |
| 15-Apr-16 | 7.38 | 4.98        | 1.6        | 5.6         | 20.6       | 10.1       | 3.1         | 32.2                       | 1.11                       | 0.159 | 0.086 | 0.039 | 0.017 |
| 18-Apr-16 | 7.29 | 5.07        | 1.54       | 5.9         | 20.5       | 12.5       | 2.8         | 26.8                       | 1.16                       | 0.154 | 0.082 | 0.035 | 0.014 |
| 20-Apr-16 | 7.45 | 4.71        | 1.32       | 5.2         | 14.6       | 9.0        | 2.8         | 19.4                       | 1.09                       | 0.152 | 0.081 | 0.035 | 0.014 |
| 22-Apr-16 | 7.65 | 4.71        | 1.43       | 5.4         | 15.4       | 10.6       | 3.9         | 24.0                       | 1.08                       | 0.153 | 0.082 | 0.035 | 0.015 |
| 25-Apr-16 | 7.46 | 4.81        | 1.43       | 5.3         | 14.6       | 9.1        | 2.0         | 13.0                       | 1.10                       | 0.151 | 0.081 | 0.034 | 0.014 |
| 27-Apr-16 | 7.45 | 4.62        | 1.44       | 5.2         | 17.3       | 9.0        | 6.0         | 16.0                       | 1.09                       | 0.148 | 0.079 | 0.034 | 0.014 |
| 29-Apr-16 | 7.57 | 4.68        | 1.44       | 2.6         | 17.8       | 9.5        | 3.8         | 28.0                       | 1.08                       | 0.149 | 0.079 | 0.034 | 0.014 |
| 02-May-16 | 7.35 | 5.32        | 1.74       | 5.3         | 17.1       | 10.9       | 3.5         | 38.0                       | 1.07                       | 0.149 | 0.080 | 0.033 | 0.013 |
| 05-May-16 | 7.11 | 4.51        | 1.56       | 5.3         | 15.8       | 8.1        | 1.6         | 13.0                       | 1.03                       | 0.145 | 0.077 | 0.033 | 0.013 |
| 09-May-16 | 7.69 | 4.53        | 1.54       | 5.5         | 16.4       | 8.9        | 1.7         | 16.0                       | 0.99                       | 0.143 | 0.075 | 0.031 | 0.013 |
| 12-May-16 | 7.52 | 4.42        | 1.51       | 5.2         | 14.4       | 9.1        | 3.3         | 3.0                        | 0.91                       | 0.138 | 0.074 | 0.031 | 0.012 |
| 18-May-16 | 7.72 | 4.40        | 1.39       | 4.7         | 17.9       | 9.1        | 1.3         | 32.7                       | 0.93                       | 0.139 | 0.072 | 0.030 | 0.012 |

**Hypolimnion 30m**

| Date      | pH   | DOC<br>mg/L | DN<br>mg/L | DSi<br>mg/L | TP<br>mg/L | DP<br>µg/l | DRP<br>µg/l | NH <sub>4</sub> -N<br>µg/l | NO <sub>3</sub> -N<br>mg/L | A254  | A300  | A350  | A400  |
|-----------|------|-------------|------------|-------------|------------|------------|-------------|----------------------------|----------------------------|-------|-------|-------|-------|
| 31-Mar-16 | 7.08 | 4.75        | 1.31       | 6.51        | 29.0       | 19.5       | 9.8         | 17.2                       | 1.14                       | 0.162 | 0.088 | 0.039 | 0.016 |
| 07-Apr-16 | 7.09 | 4.75        | 1.37       | 5.77        | 26.3       | 18.0       | 11.6        | 2.4                        | 1.06                       | 0.161 | 0.087 | 0.038 | 0.015 |
| 11-Apr-16 | 7.14 | 4.73        | -          | 5.79        | 26.6       | 17.3       | 9.0         | 14.0                       | 1.11                       | 0.159 | 0.086 | 0.038 | 0.015 |
| 13-Apr-16 | 7.13 | 4.71        | 1.49       | 5.77        | 23.5       | 15.4       | 9.3         | 17.1                       | 1.08                       | 0.148 | 0.075 | 0.031 | 0.010 |
| 15-Apr-16 | 7.34 | 4.96        | 1.58       | 6.09        | 23.4       | 16.5       | 9.2         | 14.6                       | 1.09                       | 0.161 | 0.088 | 0.040 | 0.017 |
| 18-Apr-16 | 7.12 | 5.07        | 1.51       | 5.85        | 25.1       | 19.0       | 12.0        | 7.9                        | 1.17                       | 0.160 | 0.087 | 0.038 | 0.015 |
| 20-Apr-16 | 7.11 | 4.71        | 1.31       | 5.61        | 23.7       | 16.9       | 12.1        | 8.1                        | 1.07                       | 0.159 | 0.086 | 0.038 | 0.015 |
| 22-Apr-16 | 7.31 | 4.78        | 1.44       | 5.79        | 20.5       | 15.1       | 10.3        | 6.0                        | 1.14                       | 0.158 | 0.085 | 0.037 | 0.015 |
| 25-Apr-16 | 7.38 | 4.75        | 1.43       | 5.64        | 20.9       | 14.8       | 9.7         | 14.0                       | 1.12                       | 0.157 | 0.085 | 0.037 | 0.015 |
| 27-Apr-16 | 7.20 | 4.83        | 1.46       | 5.58        | 23.4       | 18.3       | 14.6        | 15.0                       | 1.12                       | 0.158 | 0.085 | 0.037 | 0.015 |
| 29-Apr-16 | 7.27 | 4.76        | 1.46       | 3.32        | 23.7       | 17.4       | 12.5        | 15.0                       | 1.10                       | 0.158 | 0.086 | 0.037 | 0.015 |
| 02-May-16 | 7.02 | 4.69        | 1.57       | 5.78        | 24.3       | 17.9       | 12.6        | 17.0                       | 1.12                       | 0.158 | 0.085 | 0.037 | 0.015 |
| 05-May-16 | 7.03 | 4.72        | 1.55       | 5.31        | 22.8       | 17.0       | 11.5        | 9.0                        | 1.09                       | 0.157 | 0.085 | 0.037 | 0.015 |
| 09-May-16 | 7.14 | 4.59        | 1.55       | 6.22        | 24.6       | 17.4       | 11.6        | 2.0                        | 1.09                       | 0.157 | 0.085 | 0.037 | 0.015 |
| 12-May-16 | 7.05 | 4.54        | 1.59       | 5.85        | 23.4       | 16.9       | 12.7        | 0.0                        | 1.10                       | 0.156 | 0.086 | 0.037 | 0.015 |
| 18-May-16 | 7.16 | 4.59        | 1.49       | 5.65        | 24.4       | 18.9       | 10.8        | 14.4                       | 1.06                       | 0.155 | 0.084 | 0.036 | 0.014 |
| 25-May-16 | 6.99 | 4.51        | -          | 5.76        | 23.5       | 16.2       | 12.1        | 18.0                       | 1.07                       | 0.152 | 0.084 | 0.036 | 0.014 |
