# Supplementary material for: Integrating depth-dependent protist dynamics and microbial interactions in spring succession of a freshwater reservoir
Source: PubMed Central journal article supplement (PMC11080224; doi:10.1186/s40793-024-00574-5), 2024-05-08

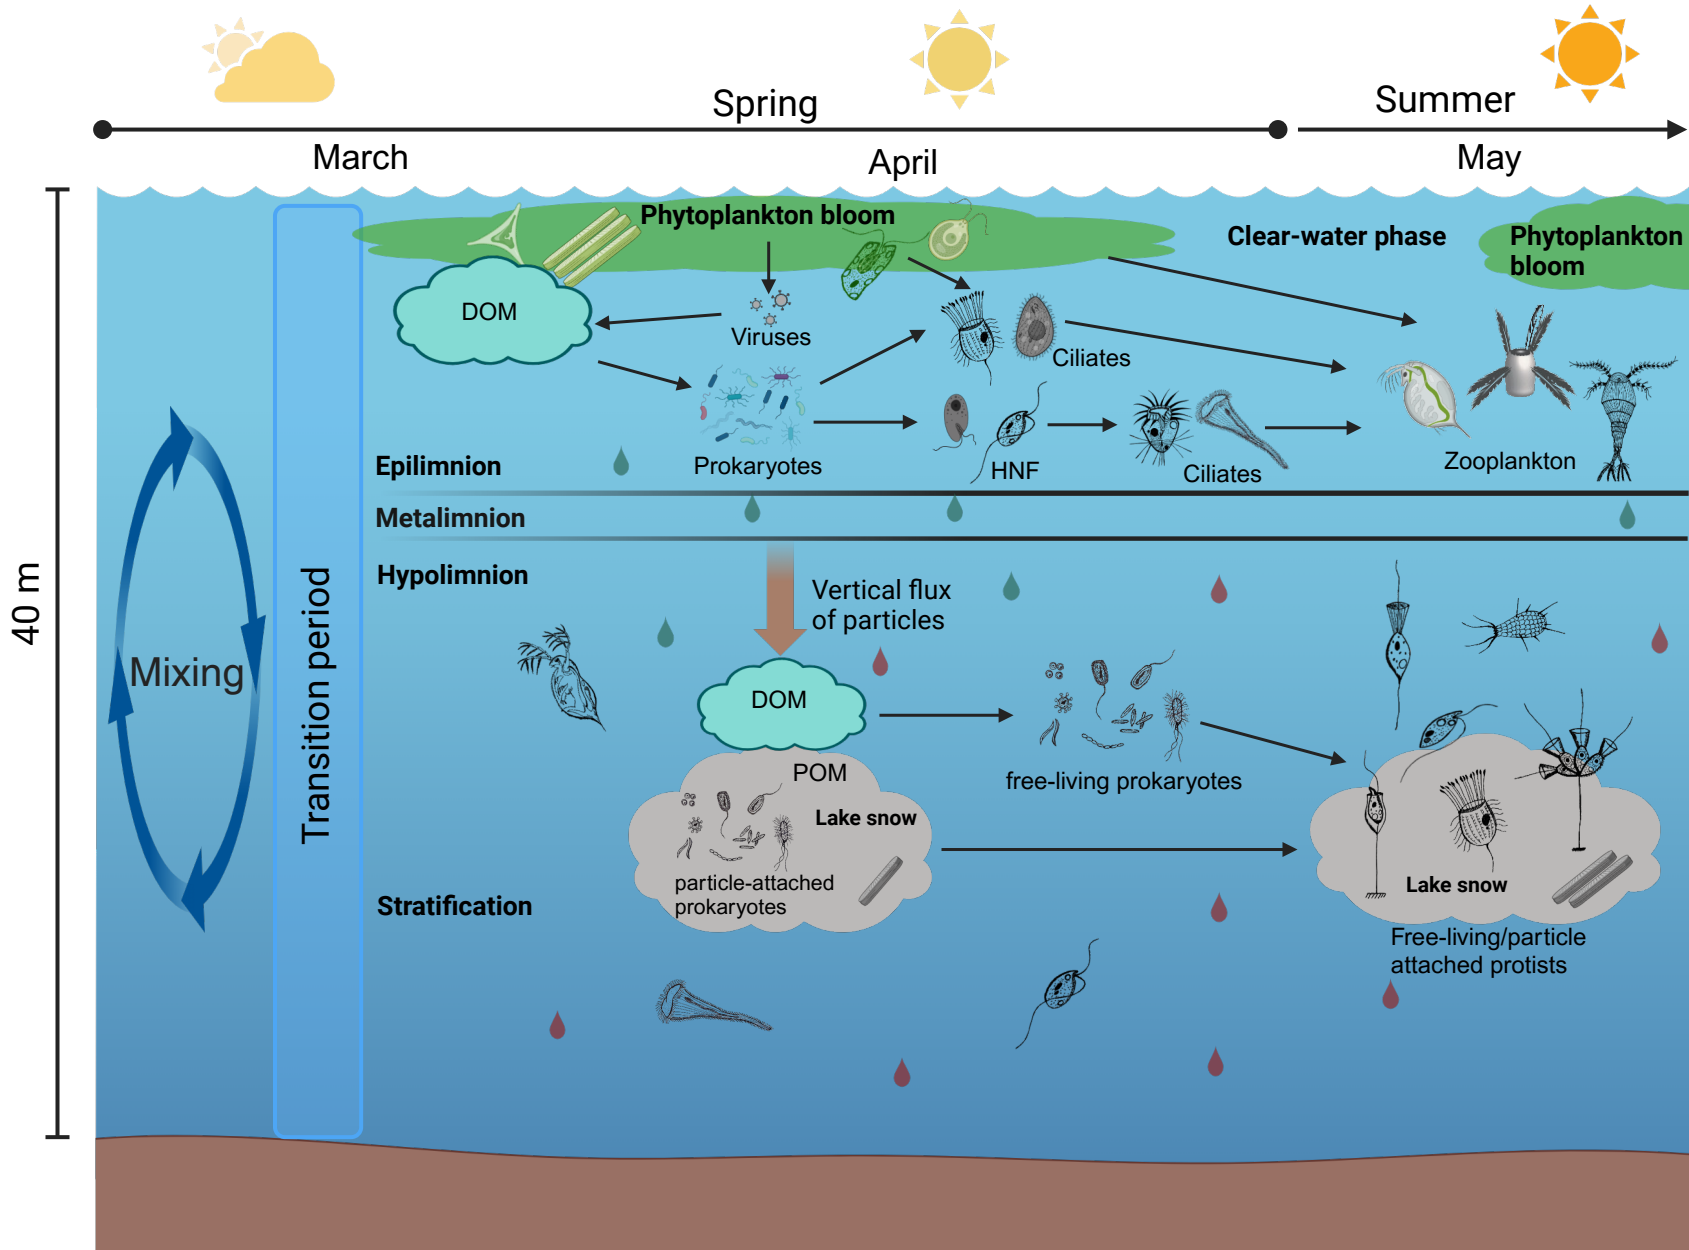

Supplement: 40793_2024_574_MOESM12_ESM.pdf [file 40793_2024_574_MOESM12_ESM.pdf]
